# Supplementary material for: Relationships between locomotive and non-locomotive MVPA and ‘ikigai’ in older Japanese adults
Source: PeerJ. 2023 May 30;11:e15413. doi: 10.7717/peerj.15413 (PMC10237179; doi:10.7717/peerj.15413)
Supplement: Supplemental Information 1 [file peerj-11-15413-s001.xlsx]

## Sheet: raw data
number	sex(1:Male, 2:Female)	Work(1:Employed, 2:Not employed)	marriage(1:Married, 2:Bereaved, 3:Separated )	Number of underlying diseases	Exercise habits(1:Yes, 2:No)	Falls(1:Yes, 2:No)	Hospitalization(1:Yes, 2:No)	Years of education(1:Yes, 2:No)	Financial comfort(1:Yes, 2:No)	Family(1:Yes, 2:No)	Ikigai	Leisure activity	Productive activity	Self-care	Step counts	Sedentary behavior	Locomotive light-intensity physical activity	Non-locomotive light-intensity physical activity	Locomotive moderate to vigorous physical activity	Non-locomotive moderate to vigorous physical activity	Total locomotive physical activity	Total non-locomotive physical activity	Total activity	Ikigai groups(1:High, 2:Middle, 3:Low)	Like to be physically active(1:Yes, 2:No)
1	2	1	2	0	1	2	2	2	2	2	28	12	12	12	8480.5	4.5	1.7	9.1	1.4	3.4	3.1	12.5	15.6	2	1
2	2	2	1	1	1	2	2	2	2	2	30	12	12	12	5649.3	4.1	1.6	8.8	0.7	2.6	2.3	11.4	13.6	3	1
3	2	1	3	0	1	1	2	2	2	1	26	9	9	9	4298.5	4.5	0.6	2.4	0.6	1.3	1.3	3.7	5	2	2
4	2	2	3	1	1	2	2	2	2	1	14	10	4	9	2596.8	7.2	0.8	8.9	0.3	2	1.1	10.9	12	1	2
5	2	2	1	2	1	2	2	2	2	2	32	10	15	15	5381	4	0.9	4	0.6	2.5	1.5	6.5	8	3	1
6	1	2	1	1	1	2	1	2	2	2	32	11	12	15	3774	7.2	0.9	3.9	0.8	2.1	1.7	6	7.7	3	1
7	2	2	1	0	1	2	2	2	1	2	32	15	12	12	9156.3	3.1	1.3	4.2	1.4	2.4	2.7	6.7	9.4	3	1
8	2	2	1	0	1	2	2	2	1	2	28	12	12	15	11835.4	6.3	2.1	7.2	3.2	5	5.4	12.2	17.5	2	1
9	2	2	2	2	2	2	2	2	1	2	30	15	15	15	5123.7	4.6	0.8	6.2	0.4	1.5	1.2	7.8	9	3	1
10	2	1	1	1	2	2	2	2	2	2	19	10	10	8	5365.8	4.6	1.6	6.7	0.5	2.2	2.2	8.9	11.1	1	2
11	2	1	1	0	1	2	2	2	1	2	32	15	13	15	8194.3	3.4	0.8	4.6	1.2	1.9	2	6.6	8.6	3	1
12	2	2	1	0	1	2	2	2	2	2	19	4	6	9	6162.3	5.2	1.3	5.4	0.6	1.5	1.9	7	8.8	1	2
13	1	1	1	0	1	2	2	2	1	2	29	12	12	15	9025.3	4.3	1.2	2.6	1	1.7	2.3	4.3	6.5	2	1
14	2	1	1	0	1	2	2	2	2	2	24	9	11	12	5697.9	9.5	1.9	8.8	1.7	3.9	3.6	12.7	16.3	2	1
15	2	2	1	0	1	2	2	2	2	2	31	12	12	12	13551.3	3.8	1.9	3.6	0.9	2.3	2.7	5.9	8.6	3	1
16	1	2	2	1	2	2	1	2	2	2	16	10	10	10	4000	7.1	0.1	1.4	0	0.2	0.1	1.6	1.6	1	1
17	2	2	3	4	1	1	2	2	2	1	19	12	12	11	1609.3	3.6	0.5	3.5	0.1	1	0.6	4.5	5.1	1	2
18	2	2	2	1	1	2	1	2	2	1	28	12	12	12	10246	3.7	1.2	4.7	0.9	3.3	2	7.9	10	2	1
19	1	2	1	0	2	2	2	2	2	2	20	6	12	15	4458.3	5.1	0.3	2.6	1	0.5	1.3	3.1	4.4	1	1
20	1	1	2	1	1	2	1	2	2	2	28	11	12	12	4864.5	5.5	1.3	7.5	0.8	1.8	2.1	9.3	11.3	2	1
21	2	2	1	1	1	1	1	2	1	2	31	15	15	15	4716	7.4	2.7	11.7	0.7	4	3.5	15.6	19.1	3	1
22	2	1	2	0	1	2	2	2	2	2	23	13	14	15	7828.3	4.2	0.6	2.2	1.2	0.6	1.9	2.8	4.7	2	1
23	2	2	2	1	1	2	2	2	2	1	10	12	12	12	7446.3	2.2	1.4	4.3	0.4	1.8	1.8	6.1	7.9	1	2
24	2	2	1	0	1	2	2	2	2	2	19	15	12	13	7003.3	3.3	1.3	5.4	0.8	2.1	2.2	7.5	9.7	1	1
25	2	1	2	1	2	2	2	2	2	2	30	12	12	12	4840.5	4.2	0.8	6.3	0.4	2.2	1.3	8.5	9.8	3	1
26	1	1	1	0	1	2	2	2	2	2	30	12	12	12	12416.3	4	0.8	4	3	1.8	3.8	5.9	9.7	3	1
27	2	2	2	1	2	1	2	2	1	2	30	10	9	13	8201.8	4.5	1.6	7.1	0.9	1.9	2.5	8.9	11.4	3	2
28	1	1	2	1	1	2	2	2	2	1	19	12	12	11	7776.5	3.7	1.6	5.6	1.4	2.2	2.9	7.8	10.7	1	2
29	2	2	3	1	1	1	2	2	1	2	10	14	15	12	4204	3.3	0.8	4.2	0.3	0.5	1.1	4.7	5.8	1	1
30	2	2	3	1	1	2	2	2	2	2	19	12	10	10	4996.8	3.7	2.3	3.3	0.6	0.3	2.9	3.6	6.5	1	1
31	2	2	1	0	2	2	1	2	2	2	23	12	10	13	6756.8	5.1	1	8.1	1.2	3.1	2.2	11.2	13.4	2	1
32	1	1	1	0	1	2	2	2	2	2	18	15	12	13	10862.8	4.3	1.9	3.7	2.3	2.1	4.2	5.7	9.9	1	1
33	2	2	2	2	1	1	2	2	2	2	14	6	9	12	4204	3.6	1.5	6.4	0.5	2.8	2	9.2	11.2	1	2
34	2	1	1	0	1	2	2	2	2	2	6	3	10	8	12478	2.3	1.5	5.1	1.3	5.1	2.8	10.2	13	1	2
35	2	2	1	1	2	2	2	2	2	2	26	11	9	9	5878.3	3	1	4.7	0.5	2.3	1.5	7.1	8.6	2	2
36	2	1	2	0	2	2	2	2	2	2	30	12	15	12	11203.7	3	1.4	5.2	1.3	3.8	2.6	9	11.7	3	2
37	2	1	1	0	1	1	2	2	2	2	27	3	3	13	4997	4.1	1.4	7.6	0.8	2.1	2.2	9.7	11.9	2	1
38	1	1	1	1	1	1	2	2	2	2	27	3	3	12	6357.3	2.8	1.9	3.5	0.6	1.5	2.5	5	7.5	2	1
39	1	1	1	0	1	2	2	2	2	2	27	12	12	12	7119.8	2.8	4.3	4.2	0.3	2.4	4.6	6.6	11.2	2	1
40	1	1	1	1	2	1	1	1	2	2	18	6	9	6	2432.7	2.3	2.7	2.7	0.4	1.1	3.2	3.8	7	1	2
41	2	2	1	2	1	1	2	2	2	2	22	11	10	12	4075.7	2.7	1.3	5.5	0.2	1.7	1.5	7.2	8.7	2	2
42	2	2	1	1	2	1	1	2	2	2	25	9	9	9	3032.5	4.6	1.2	7.1	0.2	2.4	1.5	9.5	10.9	2	2
43	2	2	1	0	1	1	2	2	2	2	30	12	13	13	2497.3	2.6	0.8	5.8	0.1	2.3	0.9	8.1	9.1	3	1
44	1	2	1	0	2	2	2	2	2	2	28	12	12	15	2860	4.4	0.6	2.7	0.3	1.5	0.9	4.2	5.1	2	2
45	1	2	1	2	2	2	2	2	2	2	25	12	12	12	1152.3	2.7	2.7	5	0.2	0.4	2.9	5.4	8.3	2	1
46	1	2	2	0	2	2	2	2	2	1	10	3	9	12	1834	4.6	0.6	5.8	0.4	1.1	1	6.9	7.9	1	2
47	2	2	1	1	1	2	2	2	2	2	31	12	15	12	2794.7	2.7	0.7	4.9	0.4	1	1	5.8	6.9	3	2
48	1	2	1	1	2	2	1	2	2	2	30	12	12	12	4859.3	4	1.6	5.2	0.7	1.4	2.3	6.6	8.9	3	1
49	2	2	1	0	2	2	2	2	1	2	32	15	15	15	3442.5	4.2	1.1	6.9	0.3	1.9	1.3	8.8	10.2	3	1
50	2	2	1	1	2	1	2	2	2	2	29	12	12	13	8122	3.8	2.1	6.5	0.8	4.8	2.9	11.3	14.2	2	1
51	2	2	1	0	2	2	2	2	2	2	23	11	12	12	5866.8	5.8	1.3	6.2	0.3	2.2	1.6	8.4	10	2	1
52	2	2	2	0	2	2	2	2	2	2	19	13	12	12	5088.3	3.2	1.2	7	0.8	2.2	2	9.2	11.2	1	1
53	2	2	1	1	1	2	2	2	2	2	26	9	14	15	5061.8	3.1	1.3	7.3	0.6	2.6	2	9.9	11.8	2	1
54	2	2	1	1	1	2	2	2	1	2	22	9	12	12	4139	5	1.6	7.8	0.4	2.6	2	10.4	12.4	2	1
55	2	2	1	1	1	1	2	2	1	2	25	11	15	12	2285.6	11.3	1.4	10.3	0.4	2.7	1.7	13	14.7	2	1
56	2	2	2	1	2	1	2	2	2	1	18	12	12	12	7003.5	7.2	1.4	9.1	1.4	2.6	2.8	11.8	14.6	1	2
57	2	2	1	1	1	2	2	1	1	2	20	9	9	9	4993	5.1	1.1	3.8	0.4	1.2	1.6	5	6.5	1	2
58	2	1	1	1	1	2	1	1	1	2	21	9	9	9	7631.2	5.2	1.9	7.3	1.3	2.1	3.2	9.4	12.7	2	2
59	2	2	2	1	2	1	2	2	1	2	23	15	15	15	1088.5	7.9	0.5	6.9	0	1	0.6	7.9	8.5	2	2
60	2	2	1	1	2	2	2	2	1	2	27	9	8	12	2591.4	5.3	1.1	8.4	0.1	1.9	1.2	10.3	11.5	2	1
61	2	2	1	1	1	2	2	2	1	2	32	13	14	15	12368.5	3.4	1.5	7	2.1	4.1	3.6	11	14.7	3	1
62	2	2	1	1	2	2	2	2	1	2	34	10	12	12	11024.6	9.2	3	10	3.4	3.4	6.3	13.4	19.8	3	2
63	2	2	1	1	1	2	2	2	1	2	32	13	10	15	6555.3	5.4	2	9.8	0.9	6.6	2.9	16.4	19.3	3	1
64	2	2	1	1	2	2	2	2	1	2	21	12	12	12	7582.8	7.1	2.1	8.7	1.2	4.1	3.2	12.8	16	2	2
65	2	2	2	1	1	1	2	2	1	2	23	12	9	9	8898.4	7.5	2.7	10.8	2	3.7	4.7	14.5	19.2	2	1
66	2	2	1	1	2	1	2	2	1	2	32	12	12	12	6426.5	5	1.4	7.4	0.4	2.5	1.8	9.8	11.6	3	1
67	2	1	1	0	2	2	2	2	1	2	30	12	9	9	7800.8	5.7	2.1	8.4	1.7	4.8	3.8	13.2	17	3	1
68	1	1	1	1	1	2	1	2	1	2	25	15	15	15	2838.8	7.4	1.8	5.7	0.4	2.1	2.2	7.8	10	2	2
69	2	2	1	0	1	2	2	1	1	2	27	9	9	12	1532.67	4.6	0.4	4.2	0.1	1.4	0.5	5.6	6.1	2	1
70	2	2	1	1	2	2	1	2	1	2	12	12	6	12	5361.8	7.6	2.2	8	1.6	1.9	3.8	9.9	13.7	1	2
71	2	2	1	1	1	2	2	2	1	2	28	11	13	15	1443	4	0.5	2.9	0.1	0.8	0.6	3.7	4.4	2	2
72	2	2	2	0	1	2	2	2	1	2	30	13	12	12	5938	3.9	1.7	4.3	0.1	1.3	1.8	5.5	7.3	3	2
73	1	1	1	1	2	2	1	2	1	2	20	11	12	12	11629	3.5	1.1	3.9	2.4	0.9	3.4	4.7	8.2	1	1
74	2	2	2	2	1	1	2	2	1	2	30	9	9	9	4320.2	6.3	1.5	8.9	0.6	4.8	2.1	13.7	15.8	3	1
75	1	2	1	0	2	2	1	2	1	2	32	6	8	12	4003.8	6.3	1.3	4.7	1	2.3	2.3	7	9.4	3	2
76	2	2	2	1	1	2	2	2	1	1	24	15	12	15	3442.25	5.7	1.1	5.6	0.2	2.2	1.2	7.8	9	2	1
77	2	2	1	1	1	2	2	2	1	2	26	13	13	15	12431.8	9.5	4.4	12.8	1.5	6	5.9	18.8	24.7	2	1
78	2	2	2	0	1	2	2	2	1	1	17	14	12	15	10173.8	3.6	2.5	6.1	0.7	2.7	3.2	8.9	12.1	1	1
79	2	2	1	0	2	2	2	2	1	2	24	12	9	15	2721	4.2	0.8	5.4	0.1	1.9	0.9	7.3	8.3	2	1
80	2	2	1	0	1	2	1	2	1	2	27	5	9	9	4237.67	3.2	1.3	3.7	0.6	1.7	1.8	5.4	7.2	2	1
81	1	2	2	0	1	2	1	2	1	2	29	10	12	13	7144	6.5	2.3	6.4	0.8	3.3	3	9.7	12.7	2	1
82	1	2	2	0	1	2	1	2	1	2	32	9	10	12	6191.75	3.9	2.3	5.5	1.3	1.8	3.6	7.3	10.9	3	1
83	2	2	2	1	2	2	2	2	1	2	26	12	12	12	1312	5.6	0.9	6.3	0	1.9	0.9	8.1	9.1	2	2
84	1	1	2	0	1	2	2	2	1	1	26	9	9	12	10511	2.2	1.3	3	3.9	2.9	5.2	6	11.1	2	2
85	2	2	1	1	2	2	2	2	1	2	26	13	12	12	5381.33	2.4	0.9	3.4	0.7	1.9	1.7	5.2	6.9	2	1
86	2	2	2	2	2	1	2	2	1	2	13	6	9	12	5343.5	3.6	1.5	6.4	0.5	2.8	2	9.2	11.2	1	2
